# Supplementary material for: Dietary Supplement Intake and Fecundability in a Singapore Preconception Cohort Study
Source: MDPI journal article supplement (doi:10.3390/nu14235110), 2022-12-01
Supplement: s1 [file s1]

**Table S1.** Characteristics of women according to inclusion status from the S-PRESTO study, 2015-2018 (n=1032).

| Characteristics                      | Excluded<br>(n=124) | Included<br>(n=908) | p <sup>a</sup> |
|--------------------------------------|---------------------|---------------------|----------------|
| Age                                  |                     |                     | 0.583          |
| <35 years                            | 108 (87.1)          | 774 (85.2)          |                |
| ≥35 years                            | 16 (12.9)           | 134 (14.8)          |                |
| Ethnicity                            |                     |                     | 0.638          |
| Chinese                              | 89 (71.8)           | 654 (72.0)          |                |
| Malay                                | 16 (12.9)           | 143 (15.7)          |                |
| Indian                               | 13 (10.5)           | 82 (9.0)            |                |
| Mix                                  | 6 (4.8)             | 29 (3.2)            |                |
| Parity                               |                     |                     | 0.171          |
| 0                                    | 60 (58.8)           | 596 (65.6)          |                |
| ≥1                                   | 42 (41.2)           | 312 (34.4)          |                |
| Highest education                    |                     |                     | 0.283          |
| Below tertiary                       | 47 (42.3)           | 337 (37.1)          |                |
| Tertiary and above                   | 64 (57.7)           | 571 (62.9)          |                |
| Body mass index <sup>b</sup>         |                     |                     | 0.865          |
| Underweight <18.5 kg/m <sup>2</sup>  | 8 (8.3)             | 76 (8.4)            |                |
| Normal 18.5-22.9 kg/m <sup>2</sup>   | 42 (43.8)           | 420 (46.3)          |                |
| Overweight 23-27.4 kg/m <sup>2</sup> | 29 (30.2)           | 238 (26.2)          |                |
| Obese ≥27.5 kg/m <sup>2</sup>        | 17 (17.7)           | 174 (19.2)          |                |
| Cycle regularity                     |                     |                     | 0.005          |
| Regular                              | 58 (52.3)           | 597 (65.7)          |                |
| Irregular                            | 53 (47.7)           | 311 (34.3)          |                |
| Cycle length, days                   | 30.0 (28.5-33.5)    | 29.5 (29.0-32.5)    | 0.848          |
| Smoking exposure                     |                     |                     | 0.358          |
| No                                   | 75 (72.8)           | 698 (76.9)          |                |
| Yes                                  | 28 (27.2)           | 210 (23.1)          |                |
| Alcohol intake                       |                     |                     | 0.663          |
| No                                   | 68 (54.8)           | 479 (52.8)          |                |
| Yes                                  | 56 (45.2)           | 429 (47.2)          |                |
| Unhealthful plant-based diet index   |                     |                     | 0.940          |
| Tertile 1 ≤41                        | 36 (35.6)           | 331 (36.5)          |                |
| Tertile 2 >41 to ≤47                 | 34 (33.7)           | 290 (31.9)          |                |
| Tertile 3 >47                        | 31 (30.7)           | 287 (31.6)          |                |
| Total daily energy intake, kcal/d    | 2047 (1651-2562)    | 1945 (1567-2385)    | 0.116          |

Data are presented in number (percentage) for categorical variables and median (25<sup>th</sup> – 75<sup>th</sup> percentile) for continuous variables. Total sample size of excluded women does not always equal to 124 due to missing data. S-PRESTO, Singapore PREconception Study of long-Term maternal and child Outcomes.

<sup>a</sup>Based on Pearson's chi-squared test for categorical variables and Mann-Whitney test for continuous variables.

<sup>b</sup>Classified based on cut-offs for Asian populations [42].

**Table S2.** Associations between supplement intake status and fecundability in women with pregnancy attempts of  $\leq 3$ ,  $\leq 6$  and  $\leq 12$  months at study entry from the S-PRESTO study, 2015-2018.

| Type of supplements             | Attempted time to conceive at study entry |            |                            |            |                             |            |
|---------------------------------|-------------------------------------------|------------|----------------------------|------------|-----------------------------|------------|
|                                 | $\leq 3$ months<br>(n=527)                |            | $\leq 6$ months<br>(n=653) |            | $\leq 12$ months<br>(n=774) |            |
|                                 | FR                                        | 95% CI     | FR                         | 95% CI     | FR                          | 95% CI     |
| Supplement intake status        |                                           |            |                            |            |                             |            |
| No supplements                  | 1.00                                      | (Ref.)     | 1.00                       | (Ref.)     | 1.00                        | (Ref.)     |
| Any supplement                  | 1.29                                      | 0.98, 1.68 | 1.25                       | 0.98, 1.60 | 1.29                        | 1.02, 1.64 |
| Folic acid                      |                                           |            |                            |            |                             |            |
| Non-user                        | 1.00                                      | (Ref.)     | 1.00                       | (Ref.)     | 1.00                        | (Ref.)     |
| User                            | 1.32                                      | 1.03, 1.68 | 1.26                       | 1.01, 1.58 | 1.31                        | 1.05, 1.62 |
| Folic acid type                 |                                           |            |                            |            |                             |            |
| Non-user                        | 1.00                                      | (Ref.)     | 1.00                       | (Ref.)     | 1.00                        | (Ref.)     |
| Single vitamin                  | 1.41                                      | 1.02, 1.95 | 1.29                       | 0.96, 1.72 | 1.32                        | 1.01, 1.73 |
| Multivitamin                    | 1.18                                      | 0.86, 1.62 | 1.20                       | 0.90, 1.61 | 1.22                        | 0.92, 1.62 |
| Single vitamin and multivitamin | 1.57                                      | 0.97, 2.55 | 1.38                       | 0.90, 2.12 | 1.53                        | 1.03, 2.28 |
| Fish oil                        |                                           |            |                            |            |                             |            |
| Non-user                        | 1.00                                      | (Ref.)     | 1.00                       | (Ref.)     | 1.00                        | (Ref.)     |
| User                            | 1.01                                      | 0.75, 1.37 | 1.00                       | 0.76, 1.31 | 1.03                        | 0.80, 1.33 |
| Evening primrose oil            |                                           |            |                            |            |                             |            |
| Non-user                        | 1.00                                      | (Ref.)     | 1.00                       | (Ref.)     | 1.00                        | (Ref.)     |
| User                            | 0.41                                      | 0.18, 0.92 | 0.54                       | 0.29, 1.01 | 0.54                        | 0.30, 0.99 |
| Iron                            |                                           |            |                            |            |                             |            |
| Non-user                        | 1.00                                      | (Ref.)     | 1.00                       | (Ref.)     | 1.00                        | (Ref.)     |
| User                            | 1.16                                      | 0.88, 1.53 | 1.19                       | 0.93, 1.52 | 1.21                        | 0.95, 1.53 |
| Zinc                            |                                           |            |                            |            |                             |            |
| Non-user                        | 1.00                                      | (Ref.)     | 1.00                       | (Ref.)     | 1.00                        | (Ref.)     |
| User                            | 1.11                                      | 0.83, 1.47 | 1.14                       | 0.88, 1.47 | 1.16                        | 0.91, 1.49 |
| Selenium                        |                                           |            |                            |            |                             |            |
| Non-user                        | 1.00                                      | (Ref.)     | 1.00                       | (Ref.)     | 1.00                        | (Ref.)     |
| User                            | 1.14                                      | 0.84, 1.54 | 1.16                       | 0.88, 1.53 | 1.22                        | 0.94, 1.58 |
| Iodine                          |                                           |            |                            |            |                             |            |
| Non-user                        | 1.00                                      | (Ref.)     | 1.00                       | (Ref.)     | 1.00                        | (Ref.)     |
| User                            | 1.23                                      | 0.91, 1.66 | 1.26                       | 0.96, 1.65 | 1.29                        | 1.00, 1.67 |
| Vitamin B6                      |                                           |            |                            |            |                             |            |
| Non-user                        | 1.00                                      | (Ref.)     | 1.00                       | (Ref.)     | 1.00                        | (Ref.)     |
| User                            | 1.13                                      | 0.87, 1.48 | 1.15                       | 0.90, 1.47 | 1.17                        | 0.93, 1.48 |
| Vitamin B12                     |                                           |            |                            |            |                             |            |
| Non-user                        | 1.00                                      | (Ref.)     | 1.00                       | (Ref.)     | 1.00                        | (Ref.)     |
| User                            | 1.19                                      | 0.91, 1.55 | 1.18                       | 0.92, 1.50 | 1.19                        | 0.94, 1.50 |
| Vitamin C                       |                                           |            |                            |            |                             |            |
| Non-user                        | 1.00                                      | (Ref.)     | 1.00                       | (Ref.)     | 1.00                        | (Ref.)     |
| User                            | 1.21                                      | 0.94, 1.56 | 1.17                       | 0.93, 1.48 | 1.18                        | 0.95, 1.48 |
| Vitamin D                       |                                           |            |                            |            |                             |            |
| Non-user                        | 1.00                                      | (Ref.)     | 1.00                       | (Ref.)     | 1.00                        | (Ref.)     |
| User                            | 1.12                                      | 0.85, 1.47 | 1.14                       | 0.89, 1.47 | 1.17                        | 0.93, 1.49 |
| Vitamin E                       |                                           |            |                            |            |                             |            |
| Non-user                        | 1.00                                      | (Ref.)     | 1.00                       | (Ref.)     | 1.00                        | (Ref.)     |
| User                            | 1.05                                      | 0.79, 1.40 | 1.10                       | 0.85, 1.42 | 1.14                        | 0.89, 1.46 |

Data were analysed using the discrete-time proportional hazards model, adjusting for age, ethnicity, education, parity, body mass index, cycle regularity, smoking exposure, alcohol intake, unhealthful plant-based diet index and total daily energy intake. S-PRESTO, Singapore PREconception Study of long-Term maternal and child Outcomes; FR, fecundability ratio; CI, confidence interval; Ref., reference.

**Table S3.** Associations between supplement intake status and fecundability in women without polycystic ovarian syndrome (PCOS) or using singleton live birth as the outcome measure from the S-PRESTO study, 2015-2018.

| Type of supplements             | Without PCOS<br>(n=898) |            | Singleton live birth<br>as outcome (n=908) |            |
|---------------------------------|-------------------------|------------|--------------------------------------------|------------|
|                                 | FR                      | 95% CI     | FR                                         | 95% CI     |
| Supplement intake status        |                         |            |                                            |            |
| No supplements                  | 1.00                    | (Ref.)     | 1.00                                       | (Ref.)     |
| Any supplement                  | 1.32                    | 1.05, 1.66 | 1.37                                       | 1.08, 1.75 |
| Folic acid                      |                         |            |                                            |            |
| Non-user                        | 1.00                    | (Ref.)     | 1.00                                       | (Ref.)     |
| User                            | 1.29                    | 1.05, 1.60 | 1.34                                       | 1.08, 1.67 |
| Folic acid type                 |                         |            |                                            |            |
| Non-user                        | 1.00                    | (Ref.)     | 1.00                                       | (Ref.)     |
| Single vitamin                  | 1.30                    | 1.00, 1.68 | 1.34                                       | 1.03, 1.76 |
| Multivitamin                    | 1.25                    | 0.95, 1.65 | 1.23                                       | 0.92, 1.65 |
| Single vitamin and multivitamin | 1.41                    | 0.95, 2.10 | 1.67                                       | 1.12, 2.47 |
| Fish oil                        |                         |            |                                            |            |
| Non-user                        | 1.00                    | (Ref.)     | 1.00                                       | (Ref.)     |
| User                            | 1.00                    | 0.78, 1.28 | 0.98                                       | 0.76, 1.28 |
| Evening primrose oil            |                         |            |                                            |            |
| Non-user                        | 1.00                    | (Ref.)     | 1.00                                       | (Ref.)     |
| User                            | 0.58                    | 0.32, 1.03 | 0.66                                       | 0.38, 1.15 |
| Iron                            |                         |            |                                            |            |
| Non-user                        | 1.00                    | (Ref.)     | 1.00                                       | (Ref.)     |
| User                            | 1.19                    | 0.95, 1.50 | 1.23                                       | 0.97, 1.56 |
| Zinc                            |                         |            |                                            |            |
| Non-user                        | 1.00                    | (Ref.)     | 1.00                                       | (Ref.)     |
| User                            | 1.14                    | 0.89, 1.44 | 1.21                                       | 0.94, 1.55 |
| Selenium                        |                         |            |                                            |            |
| Non-user                        | 1.00                    | (Ref.)     | 1.00                                       | (Ref.)     |
| User                            | 1.18                    | 0.92, 1.53 | 1.21                                       | 0.93, 1.58 |
| Iodine                          |                         |            |                                            |            |
| Non-user                        | 1.00                    | (Ref.)     | 1.00                                       | (Ref.)     |
| User                            | 1.29                    | 1.00, 1.66 | 1.29                                       | 0.99, 1.68 |
| Vitamin B6                      |                         |            |                                            |            |
| Non-user                        | 1.00                    | (Ref.)     | 1.00                                       | (Ref.)     |
| User                            | 1.18                    | 0.94, 1.48 | 1.20                                       | 0.95, 1.53 |
| Vitamin B12                     |                         |            |                                            |            |
| Non-user                        | 1.00                    | (Ref.)     | 1.00                                       | (Ref.)     |
| User                            | 1.20                    | 0.95, 1.50 | 1.22                                       | 0.97, 1.55 |
| Vitamin C                       |                         |            |                                            |            |
| Non-user                        | 1.00                    | (Ref.)     | 1.00                                       | (Ref.)     |
| User                            | 1.18                    | 0.95, 1.46 | 1.24                                       | 0.99, 1.55 |
| Vitamin D                       |                         |            |                                            |            |
| Non-user                        | 1.00                    | (Ref.)     | 1.00                                       | (Ref.)     |
| User                            | 1.14                    | 0.90, 1.44 | 1.17                                       | 0.91, 1.49 |
| Vitamin E                       |                         |            |                                            |            |
| Non-user                        | 1.00                    | (Ref.)     | 1.00                                       | (Ref.)     |
| User                            | 1.10                    | 0.86, 1.40 | 1.17                                       | 0.91, 1.50 |

Data were analysed using the discrete-time proportional hazards model, adjusting for age, ethnicity, education, parity, body mass index, cycle regularity, smoking exposure, alcohol intake, unhealthful plant-based diet index and total daily energy intake. S-PRESTO, Singapore PREconception Study of long-Term maternal and child Outcomes; PCOS, polycystic ovarian syndrome; FR, fecundability ratio; CI, confidence interval; Ref., reference.

**Table S4.** Serum/plasma micronutrient levels of women based on their respective supplement intake status for folic acid, vitamins B6, B12, D, and E from the S-PRESTO study, 2015-2018.

| <b>Serum/plasma micronutrients</b>        | <b>Total</b>        | <b>Non-user</b>     | <b>User</b>         | <b>p<sup>a</sup></b> |
|-------------------------------------------|---------------------|---------------------|---------------------|----------------------|
| Folic acid, nmol/L                        | 28.7 (16.9-54.4)    | 18.1 (12.8-25.2)    | 51.0 (32.5-79.0)    | <0.001               |
| Vitamin B6 (pyridoxal phosphate), nmol/L  | 54.4 (39.9-85.3)    | 48.6 (37.0-68.9)    | 109.5 (59.4-223.0)  | <0.001               |
| Vitamin B12, pmol/L                       | 245.0 (190.0-313.0) | 230.5 (180.0-287.0) | 302.0 (230.5-385.0) | <0.001               |
| Vitamin D3, nmol/L                        | 52.2 (38.3-62.9)    | 50.1 (36.7-60.1)    | 58.1 (49.7-68.2)    | <0.001               |
| Vitamin E (alpha-tocopherol), $\mu$ mol/L | 32.5 (28.7-37.6)    | 31.8 (28.4-36.4)    | 35.2 (30.3-40.3)    | <0.001               |

Data are presented in median (25<sup>th</sup> – 75<sup>th</sup> percentile). S-PRESTO, Singapore PREconception Study of long-Term maternal and child Outcomes.

<sup>a</sup>Based on Mann-Whitney test.

**Table S5.** Associations between serum/plasma micronutrient levels and fecundability in women from the S-PRESTO study, 2015-2018.

| <b>Serum/plasma micronutrients</b>              | <b>n (%)</b> | <b>FR</b> | <b>95% CI</b> |
|-------------------------------------------------|--------------|-----------|---------------|
| Folic acid, nmol/L                              |              |           |               |
| Tertile 1 $\leq 20.0$                           | 294 (33.4)   | 1.00      | (Ref.)        |
| Tertile 2 $>20.0$ to $\leq 44.6$                | 294 (33.4)   | 1.25      | 0.96, 1.62    |
| Tertile 3 $>44.6$                               | 292 (33.2)   | 1.47      | 1.12, 1.93    |
| Vitamin B6 (pyridoxal phosphate), nmol/L        |              |           |               |
| Tertile 1 $\leq 43.7$                           | 292 (33.3)   | 1.00      | (Ref.)        |
| Tertile 2 $>43.7$ to $\leq 71.7$                | 293 (33.4)   | 0.99      | 0.76, 1.28    |
| Tertile 3 $>71.7$                               | 291 (33.2)   | 1.04      | 0.80, 1.35    |
| Vitamin B12, pmol/L                             |              |           |               |
| Tertile 1 $\leq 208.0$                          | 303 (34.4)   | 1.00      | (Ref.)        |
| Tertile 2 $>208.0$ to $\leq 284.0$              | 284 (32.3)   | 1.23      | 0.95, 1.59    |
| Tertile 3 $>284.0$                              | 293 (33.3)   | 1.26      | 0.97, 1.63    |
| Vitamin D3, nmol/L                              |              |           |               |
| Tertile 1 $\leq 44.0$                           | 293 (33.4)   | 1.00      | (Ref.)        |
| Tertile 2 $>44.0$ to $\leq 58.4$                | 292 (33.3)   | 0.96      | 0.72, 1.28    |
| Tertile 3 $>58.4$                               | 292 (33.3)   | 1.09      | 0.82, 1.46    |
| Vitamin E (alpha-tocopherol), $\mu\text{mol/L}$ |              |           |               |
| Tertile 1 $\leq 29.7$                           | 294 (33.5)   | 1.00      | (Ref.)        |
| Tertile 2 $>29.7$ to $\leq 35.7$                | 291 (33.2)   | 0.87      | 0.68, 1.11    |
| Tertile 3 $>35.7$                               | 292 (33.3)   | 0.87      | 0.67, 1.11    |

Data were analysed using the discrete-time proportional hazards model, adjusting for age, ethnicity, education, parity, body mass index, cycle regularity, smoking exposure, alcohol intake, unhealthful plant-based diet index and total daily energy intake. S-PRESTO, Singapore PREconception Study of long-Term maternal and child Outcomes; FR, fecundability ratio; CI, confidence interval; Ref., reference.

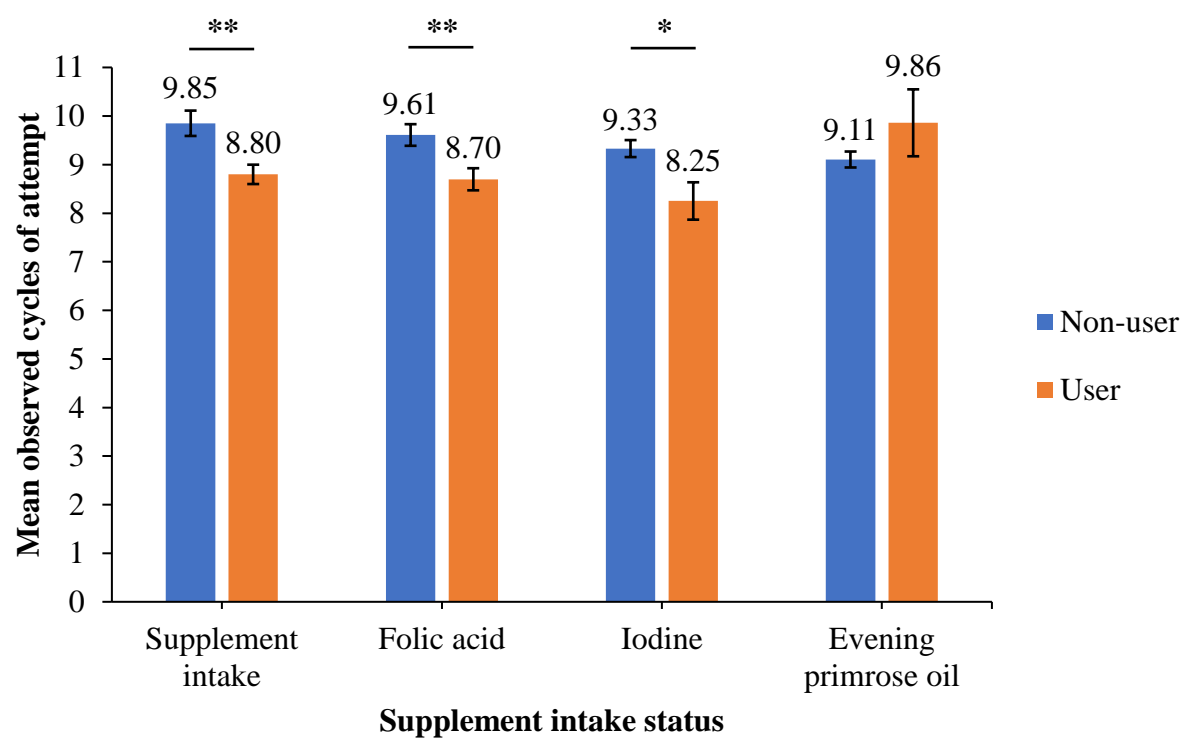

**Figure S1.** Bar chart showing the mean observed cycles of attempt by supplement intake status from the S-PRESTO study, 2015-2018 (n=908). Error bars denote  $\pm$  standard error of mean. Based on unpaired t-test, \* denotes  $p < 0.05$  and \*\* denotes  $p < 0.01$ . S-PRESTO, Singapore PREconception Study of long-Term maternal and child Outcomes.
